# Supplementary material for: The iPPI-DB initiative: a community-centered database of protein–protein interaction modulators
Source: PubMed Central journal article supplement — Bioinformatics. 2021 Jan 8;37(1):89–96. doi: 10.1093/bioinformatics/btaa1091 (PMC8034526; doi:10.1093/bioinformatics/btaa1091), 2021-01-08
Supplement: btaa1091_supplementary_data.pdf [file btaa1091_supplementary_data.pdf]

# Supplementary information

## The iPPI-DB initiative: A community-centered database of Protein-Protein Interaction modulators

Rachel Torchet, Karen Druart, Luis Checa Ruano, Alexandra Moine-Franel, H el ene Borges, Olivia Doppelt-Azeroual, Bryan Brancotte, Fabien Mareuil, Michael Nilges, Herv e M enager and Olivier Sperandio

### ADD NEW CONTENT

| ID | Bibliography | PDB id | Architecture | Composition | PPI | Compounds | Activity Tests |
|----|--------------|--------|--------------|-------------|-----|-----------|----------------|
|----|--------------|--------|--------------|-------------|-----|-----------|----------------|

**Let's get started!**  
Step 1 on 8

Please provide a valid ID for your bibliographic source, either a PubMed ID a patent ID, or a DOI. This ID should correspond to a bibliographic source in its final format. Therefore, PubMed articles in « Just Accepted » format should not be used as a source of data as they are not considered the official version of record.

|           |        |     |
|-----------|--------|-----|
| PubMed ID | Patent | DOI |
|-----------|--------|-----|

Bibliographic ID \*

10.1158/0008-5472.CAN-12-2807

Next step

**Step 1:** Enter the ID of the bibliographic source, such as PubMed ID, patent ID or DOI. The website will automatically fetch the information (title, author...).

| ID | Bibliography | PDB id | Architecture | Composition | PPI | Compounds | Activity Tests |
|----|--------------|--------|--------------|-------------|-----|-----------|----------------|
|----|--------------|--------|--------------|-------------|-----|-----------|----------------|

**Bibliography informations**  
Step 2 on 8

According to the ID you provided, we fetched the following data. Please check them and click on the appropriate check boxes.

DOI 10.1158/0008-5472.CAN-12-2807

**MDM2 Small-Molecule Antagonist RG7112 Activates p53 Signaling and Regresses Human Tumors in Preclinical Cancer Models**

*Tovar C., Graves B., Packman K., Filipovic Z., Xia B. H. M., Tardell C., Garrido R., Lee E., Kolinsky K., To K.-H., Linn M., Podlaski F., Wovkulich P., Vu B., Vassilev L. T.*  
Cancer Research

This publication contains :

- Cytotoxicity data
- In silico study
- In vitro study
- In vivo study
- In cellulo study
- Pharmacokinetic study
- X-Ray data

Next step

**Step 2:** Select the studies carried out within the publication.

| ID | Bibliography | PDB id | Architecture | Composition | PPI | Compounds | Activity Tests |
|----|--------------|--------|--------------|-------------|-----|-----------|----------------|
|----|--------------|--------|--------------|-------------|-----|-----------|----------------|

## Your PDB ID please

Step 3 on 8

Please provide a valid PDB code that contains the structure of the full PPI complex and all protein partners.  
For example, in the case of a heterodimer the PDB should contain partner A and partner B.

PDB ID \*

IYCR

Next step

**Step 3:** Enter the PDB ID containing the structure of the protein-protein interaction.

| ID | Bibliography | PDB id | Architecture | Composition | PPI | Compounds | Activity Tests |
|----|--------------|--------|--------------|-------------|-----|-----------|----------------|
|----|--------------|--------|--------------|-------------|-----|-----------|----------------|

## Which architecture fits your PPI?

Step 4 on 8

Now you need to select an architecture for the PPI complex among the proposed schematics below.  
If your PPI complex is not among them, please select « Custom »

PPI Complex Type:  
Inhibited

### Inhibited

|                      |                    |               |
|----------------------|--------------------|---------------|
| <p>Hetero2-merAB</p> | <p>Homo2-merA2</p> | <p>Custom</p> |
|----------------------|--------------------|---------------|

### Stabilized

|                         |                            |                      |
|-------------------------|----------------------------|----------------------|
| <p>Hetero2-merAB</p>    | <p>Homo2-merA2</p>         | <p>Hetero2-merA2</p> |
| <p>Hetero3-merA2</p>    | <p>Hetero3-merA2 dimer</p> | <p>Hetero4-merA2</p> |
| <p>Ring Like3-merA2</p> | <p>Ring Like5-merA2</p>    | <p>Custom</p>        |

Next step

**Step 4:** Select the mode of action of the compounds acting on the interaction between "Inhibited" or "Stabilized" and the type of structural architecture of the target

## Protein complex assignment

Step 5 on 8

For the PDB code: **1YCR**You have selected an **Hetero2merAB** that is **inhibited** by the binding of PPI modulator.

Please select the protein that is bound by the modulator and also the protein partner if applicable. You also need to specify the PFAM protein domain(s).

|                 |                            |         |
|-----------------|----------------------------|---------|
| Complex type *  | Protein *                  | Domain  |
| Partner complex | P04637 (Cellular tumor ant | Unknown |
| Complex type *  | Protein *                  | Domain  |
| Bound complex   | Q00987 (E3 ubiquitin-prot  | Unknown |

Next step

**Step 5:** Choose the protein that is bound by the compound (bound) and the protein that is displaced by the compound (partner)

## PPI target family and associated disease

Step 6 on 8

You have selected an **Hetero2merAB** that is **inhibited** by the binding of PPI modulator.

Please select a PPI target family name for the PPI you are describing. If not already present in the given list, please suggest one.

Also, please select a known disease associate with the PPI you are describing as listed in the MONDO database.

|                                |                 |
|--------------------------------|-----------------|
| PDB ID                         | 1YCR            |
| PPI Family *                   | MDM2-Like / P53 |
| Associated diseases            | cancer x        |
| Search for associated diseases | cancer          |

Next step

|                                   | Associate to           |
|-----------------------------------|------------------------|
| cancer                            | MONDO<br>MONDO:0004992 |
| cancerophobia                     | MONDO<br>MONDO:0003736 |
| cancer of long bone of upper limb | MONDO<br>MONDO:0100085 |

**Step 6:** Select/Create the PPI family in the dropdown list, then the known associated diseases. The associated diseases list is built from the Mondo Disease Ontology.

## List the compounds of the publication

Step 7 on 8

Please fill the fields below and provide naming and structure information about all the compounds present in the publication.

## Name your compound

Name in publication \*

RG7112

Common Name

RG7112

PDB Ligand ID

1F0

## Draw it

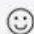

Paste SMILE code

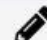

Sketch your compound

Molecule composition as SMILES

```
CCOc1cc(ccc1C2=N[C@@](C)(c3ccc(Cl)cc3)[C@](C)(N2C(=O)N4CCN(CCC[S]
(C)(=O)=O)CC4)c5ccc(Cl)cc5)C(C)(C)C
```

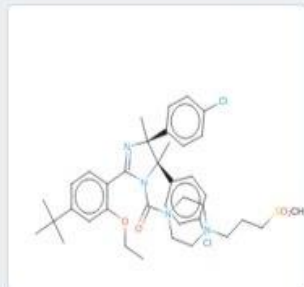

Sketch or upload (in .mol format and in 2D only) the query structure here:

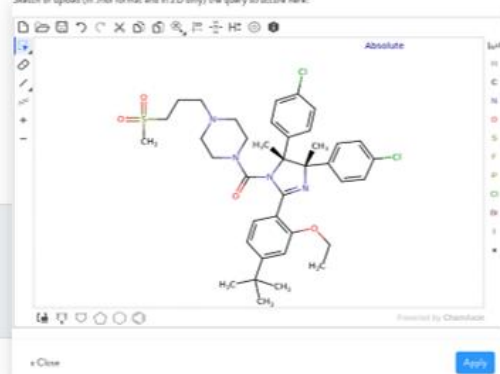

## Add complementary informations

 Does this compound contain one or more macrocycles?

[+ Add an other compound](#)

**Step 7:** Fill the form describing the compounds according to their name in the publication, their common name, their 3-character PDB ID if any. The compound can be directly built from the SMILES code, drawn using MarvinSketch from ChemAxon, or by pasting a IUPAC code into the MarvinSketch window.

## Activity tests

Step 8 on 8

Describe all your activity tests and their results.

## Test description

Test type \*

Biochemical assay

Test name \*

HTRF

Test modulation type \*

Inhibition

Total number of active compounds \*

1

## Test results

Compound name \*

RG7112

Modulation type \*

Inhibition

Activity type \*

IC50 (half maximal inhibitory con

Activity \*

18

Activity unit

nmol

Only required if 'activity type' is not Kd ratio.

## Test description

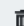

Test type \*

Cellular assay

Test name \*

MTT-assay

Test modulation type \*

Inhibition

Total number of active compounds \*

1

Cell line

SJSA-1

## Test results

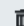

Compound name \*

RG7112

Modulation type \*

Inhibition

Activity type \*

EC50 (half maximal effective con

Activity \*

0.4

Activity unit

μmol

Only required if 'activity type' is not Kd ratio.

**Step 8:** Describe activity tests and their results. First, choose the test type: "Biochemical assay" or "Cellular assay". Select the test name, the modulation type (Inhibition, Binding or Stabilization), the number of active compounds and the cell line for the "Cellular assay". Second, fill the activity for each compound (IC50, EC50, Kd, Ki, Kd ratio), which can be declined in different unit (M, mM, μM, nM, pM).

## Describe pharmacokinetic test

Step 9 on 9

Describe all your pharmacokinetic tests and their results.

## Test description

|                 |                         |                         |                       |
|-----------------|-------------------------|-------------------------|-----------------------|
| Test name *     | Organism *              | Administration mode *   | Concentration in mg/l |
| Mouse PK PO     | Mus musculus            | ADMINISTRATION_MODES_PC |                       |
| Dose in mg/kg * | Dose interval, in hours |                         |                       |
| 10              |                         |                         |                       |

## Test results

|                                                                |                                                         |                                                          |                                                                        |
|----------------------------------------------------------------|---------------------------------------------------------|----------------------------------------------------------|------------------------------------------------------------------------|
| Tolerated                                                      | Oral Bioavailability (%F)                               | T <sub>1/2</sub> (mn)                                    | Tmax (mn)                                                              |
| True                                                           | 46                                                      | 152                                                      |                                                                        |
| <input checked="" type="checkbox"/> Area under curve available | <input checked="" type="checkbox"/> Clearance available | <input type="checkbox"/> Maximal concentration available | <input checked="" type="checkbox"/> Volume distribution (Vd) available |
| Compound name *                                                |                                                         |                                                          |                                                                        |
| 1                                                              |                                                         |                                                          |                                                                        |

[+ Add result](#)

**Step 9:** In the case you choose "Pharmacokinetic study" at step 2, a supplementary step appears to fill the data related to these studies. The same is true for cytotoxic assays.

## Contribution almost complete!

Your contribution is not saved in the data base yet! Before saving it, you can take a moment to review. You can go back to any step to see what you provided, and then click next for the followings steps up to this final step. Once satisfied, please agree with the following terms and save your contribution.

I understand that the data provided will be, once validated, published publicly on the website. \*

[Save in Database](#)

**Final step (a):** Validation of your contribution to save in database. Compounds added are available in the query mode in orange tagged as "not validated".

2200 not validated

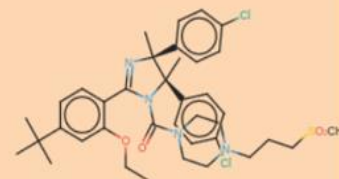

Common name : RG7112

PPI Family : None

Molecular weight: None g/mol

[Read more](#)

## Bibliography

### MDM2 Small-Molecule Antagonist RG7112 Activates p53 Signaling and Regresses Human Tumors in Preclinical Cancer Models

Tovar C., Graves B., Packman K., Filipovic Z., Xia B. H. M., Tardell C., Garrido R., Lee E., Kolinsky K., To K.-H., Linn M., Podlaski F., Wovkulich P., Vu B., Vassilev L. T. *Cancer Research* (2013) DOI - 10.1158/0008-5472.CAN-12-2807

Contains : X-Ray Data, In Vitro Study, In Cellulo Study, In Vivo Study

## PPI Architecture

PDB code of the PPI: [1YCR](#)

PPI family: MDM2-Like / P53

Total number of pockets in the complex: 1

PPI name: MDM2 / P53

PPI symmetry: AS (asymmetric)

Diseases: cancer (MONDO:0004992)

| Complex type | Protein                | Domain  |
|--------------|------------------------|---------|
| Partner      | <a href="#">P04637</a> | unknown |
| Bound        | <a href="#">Q00987</a> | unknown |

## Compounds

| Compound Name In The Publication | Chemical structure                                                                 | Iupac Name | Pdb Ligand Id       | iPPI-DB ID           |
|----------------------------------|------------------------------------------------------------------------------------|------------|---------------------|----------------------|
| RG7112                           | 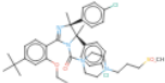 |            | <a href="#">1FO</a> | <a href="#">2200</a> |

## Tests

### Test Activity Description - MTT-assay

Protein Domain Bound Complex: MDM2 Q00987-unknown (1)

Test Type: Cellular assay

Total Number Of Active Compounds: 1

Is Primary: False

Test Modulation Type: Inhibition

Cell Line: SJSA-1

| Compound | Modulation type | Activity type | Activity |
|----------|-----------------|---------------|----------|
| RG7112   | Inhibition      | pEC50         | 6.40     |

### Test Activity Description - HTRF

Protein Domain Bound Complex: MDM2 Q00987-unknown (1)

Test Type: Biochemical assay

Total Number Of Active Compounds: 1

Is Primary: False

Test Modulation Type: Inhibition

Cell Line: None

| Compound | Modulation type | Activity type | Activity |
|----------|-----------------|---------------|----------|
| RG7112   | Inhibition      | pIC50         | 7.74     |

**Final step (b):** The final page summarizing all information about your contribution.
